## Inhibitory and Stimulatory Micropeptides Preferentially Bind to Different Conformations of the Cardiac Calcium Pump

Sean R. Cleary, Xuan Fang, Ellen E. Cho, Marsha P. Pribadi, Jaroslava Seflova, Jordan R. Beach, Peter Kekenus-Huskey, Seth L. Robia<sup>†</sup>

Department of Cell and Molecular Physiology, Loyola University Chicago, Maywood, IL 60153

### Abstract:

The ATP-dependent ion pump SERCA sequesters  $\text{Ca}^{2+}$  in the endoplasmic reticulum to establish a reservoir for cell signaling. Because of its central importance in physiology, this transporter is tightly controlled by physical interactions with tissue-specific regulatory micropeptides that tune SERCA function to match changing physiological conditions. In the heart, phospholamban (PLB) inhibits SERCA, while dwarf open reading frame (DWORF) stimulates SERCA. These competing interactions determine cardiac performance by modulating the amplitude of  $\text{Ca}^{2+}$  signals that drive the contraction/relaxation cycle. The distinct functions of these peptides may relate to their reciprocal preferences for SERCA binding. While SERCA binds PLB more avidly at low cytoplasmic  $\text{Ca}^{2+}$ , it binds DWORF better at high  $\text{Ca}^{2+}$ . In the present study, we determined that this opposing  $\text{Ca}^{2+}$  sensitivity is due to preferential binding of DWORF and PLB to different intermediate conformations that the pump samples during the  $\text{Ca}^{2+}$  transport cycle. The results suggest a mechanistic basis for inhibitory and stimulatory micropeptide function. In addition, fluorescence resonance energy transfer (FRET) measurements revealed dynamic shifts in SERCA-micropeptide binding equilibria during cellular  $\text{Ca}^{2+}$  elevations. The data suggest  $\text{Ca}^{2+}$ -dependent dynamic exchange of inhibitory and stimulatory micropeptides from SERCA during the cardiac cycle. Together, these mechanisms provide beat-to-beat modulation of cardiac  $\text{Ca}^{2+}$  handling and contribute to the heart's adaptation to the increased physiological demands of exercise.

### Significance:

Interactions between SERCA and its regulatory micropeptides modulate cardiac performance. A previous study demonstrated that while the SERCA inhibitor, phospholamban, loses affinity during intracellular  $\text{Ca}^{2+}$  elevations, its competitor DWORF stimulates SERCA and binds better at elevated  $\text{Ca}^{2+}$ . Here, we found this  $\text{Ca}^{2+}$ -dependent difference in affinity is driven by preferential micropeptide binding to different SERCA conformations sampled during its enzymatic cycle. Tight binding to different conformations of the pump may underly the distinct mechanistic functions of these regulators. Lower affinity during alternating phases of the cardiac cycle may drive dynamic exchange of inhibitory and stimulatory micropeptides during contraction and relaxation. Our results reveal mechanisms that modulate cardiac  $\text{Ca}^{2+}$  handling on a beat-to-beat basis and help the heart adapt to exercise.

### Keywords:

binding kinetics, calcium signaling, calcium transient, calcium transporter, cardiac calcium handling, conformational selection, dissociation constant ( $K_D$ ), Dwarf open reading frame (DWORF), fluorescence microscopy, fluorescence resonance energy transfer (FRET), membrane protein regulatory complex, membrane protein-protein interactions, micropeptides, phospholamban, physiological model, Post-Albers cycle, sarco(endo)plasmic reticulum, SERCA2a, transport ATPase

<sup>†</sup>To Whom Correspondence Should be Addressed: Seth L. Robia, Department of Cell and Molecular Physiology, Stritch School of Medicine, Loyola University Chicago, 2160 S. First Ave. Maywood, IL 60153  
e-mail: [srobia@luc.edu](mailto:srobia@luc.edu)

## INTRODUCTION

The type 2a sarco/endoplasmic reticulum  $\text{Ca}^{2+}$ -ATPase (SERCA2a) is a P-type ion transporter responsible for sequestering cytoplasmic  $\text{Ca}^{2+}$  into the sarcoplasmic reticulum (SR) of cardiac muscle cells. The rate of  $\text{Ca}^{2+}$  transport by SERCA2a determines how quickly the heart muscle relaxes during the diastolic phase of the cardiac cycle as the ventricle is filling with blood. SERCA2a function also sets the amplitude of SR  $\text{Ca}^{2+}$  release, which determines the heart's contractile strength during the systolic phase when blood is being ejected from the heart. Pathological decreases in SERCA expression, function, and regulation are associated with heart failure (6-8), focusing attention on SERCA as a possible therapeutic target (9, 10). So far, attempts to enhance transport function in patients by increasing expression of SERCA2a with gene delivery have been unsuccessful (11). Therefore, there is great interest in understanding physiological SERCA regulatory mechanisms to create a path toward rationally designed therapies that improve the function of endogenous SERCA.

The principal regulator of SERCA function in the heart is phospholamban (PLB), a single-pass transmembrane micropeptide (**Fig. 1**, blue). PLB physically interacts with SERCA and reduces its apparent affinity for  $\text{Ca}^{2+}$ , decreasing  $\text{Ca}^{2+}$  uptake (12). This inhibition is relieved at high concentrations of cytoplasmic  $\text{Ca}^{2+}$  and after phosphorylation of PLB by cAMP-dependent protein kinase A (PKA) (13, 14), providing a mechanism to increase  $\text{Ca}^{2+}$  transport in response to exercise and other physiologic stress. The relief of SERCA inhibition was initially attributed to dissociation of the PLB-SERCA complex after PLB phosphorylation or  $\text{Ca}^{2+}$  binding to SERCA (15-19). However, subsequent spectroscopic studies showed that the PLB-SERCA interaction was constitutive (20, 21), with only modest changes in PLB-SERCA affinity in high  $\text{Ca}^{2+}$  and after PLB phosphorylation (22, 23). Thus, PLB may be considered a subunit of SERCA, and the mechanism for relief of inhibition must be due to some other structural rearrangement of the intact PLB-SERCA complex (24). We have previously shown that  $\text{Ca}^{2+}$ -dependent shifts in SERCA conformational poise alter the apparent affinity of SERCA for PLB (4, 22, 25). We hypothesize PLB must bind more tightly to certain SERCA conformations, and this may be a key aspect of its regulatory function. However, the interaction energetics of PLB with major intermediate states in the  $\text{Ca}^{2+}$  transport cycle have not yet been measured. In the present study, we quantified PLB-SERCA interactions by FRET, controlling the conformational poise of SERCA while the enzyme was still in its intact cellular membrane environment.

In addition to direct regulation by phosphorylation, PLB inhibitory potency may be modulated indirectly by oligomerization of PLB into pentamers (**Fig. 1**, "PLB<sub>5</sub>"). PLB pentamers represent an inactive, reserve pool (26) that serves as a buffer, reducing and stabilizing the concentration of the active, monomeric species. This buffering effect may be tuned by sympathetic stimulation, since oligomerization is further stabilized by PLB phosphorylation (23, 27). The physiological responsiveness of these dynamic binding equilibria must be governed by the rates of exchange of PLB protomers between SERCA- and pentamer-bound pools. We (28) and others (29) have provided evidence that the exchange of PLB monomers from pentamers occurs slowly relative to rapid exchange from the SERCA regulatory complex, but the underlying kinetics of these regulatory binding events have not been definitively measured. Therefore, the degree to which PLB monomers may dynamically redistribute among these pools in the cardiac SR remains unclear.

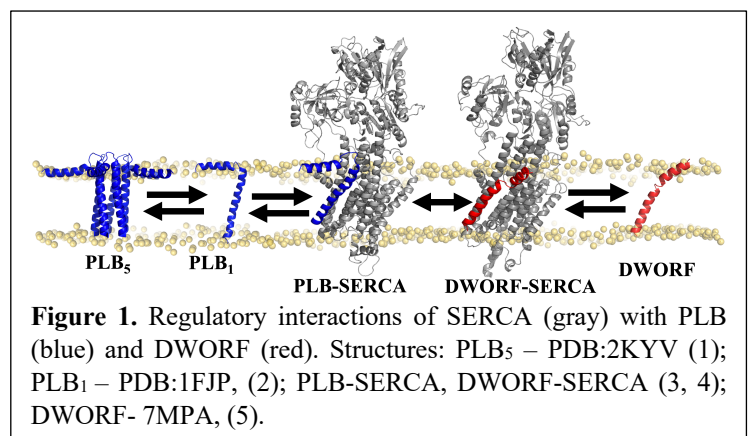

Here, we compared the binding dynamics of PLB with that of another SERCA-regulating membrane micropeptide expressed in the heart, dwarf open reading frame (DWORF) (**Fig. 1**, red) (5). In contrast to inhibitory PLB, DWORF has been proposed to increase  $\text{Ca}^{2+}$  transport in the heart by competing with PLB for its binding site on SERCA, relieving inhibition (30, 31), and it may also directly stimulate the pump (4, 32). We previously observed that DWORF has low oligomerization affinity, but DWORF and PLB have similar

affinity for SERCA (33, 34). Interestingly, we recently determined that DWORF-SERCA binding shows an opposite  $\text{Ca}^{2+}$ -dependence compared to PLB-SERCA. That is, DWORF affinity for SERCA increases with elevated  $\text{Ca}^{2+}$  (4). This implies that  $\text{Ca}^{2+}$  elevations favor DWORF in the competition with PLB for SERCA binding, but then PLB is favored as  $\text{Ca}^{2+}$  levels fall during diastole. The apparent dynamic competition of DWORF and PLB may be an important factor in future therapeutic strategies based on gene delivery of micropeptides (31, 35). We compared the energetics and kinetics of PLB and DWORF interactions with SERCA using a combination of enzymology and cell biology techniques. The results reveal mechanistic differences between inhibitory and stimulatory cardiac micropeptides and provide insight into how the heart may adapt to the shifting physiological demands of rest and exercise.

## RESULTS

### *SERCA Affinity for PLB and DWORF is Dependent on $\text{Ca}^{2+}$ -pump conformation*

We previously demonstrated that PLB-SERCA binding affinity is reduced by 30-40% in response to a sustained elevation of intracellular  $\text{Ca}^{2+}$ , whereas the DWORF-SERCA interaction is slightly *more* stable with elevated  $[\text{Ca}^{2+}]$  (4, 22). Since SERCA conformational poise changes between periods of elevated  $\text{Ca}^{2+}$  (during cardiac contraction) and low  $\text{Ca}^{2+}$  (during cardiac relaxation) (36), we reasoned that PLB and DWORF must preferentially bind to different intermediate conformations of the SERCA enzymatic cycle. The SERCA enzymatic cycle is represented in **Fig. 2A** with a simplified Post-Albers scheme (37). At basal  $\text{Ca}^{2+}$  (low nM), SERCA predominantly resides in the ATP bound state, E1-ATP (38) (**Fig. 2A**, blue box). During intracellular  $\text{Ca}^{2+}$  elevations, SERCA samples all physiological enzymatic states of the  $\text{Ca}^{2+}$  transport cycle, but the intermediate states are not all equally populated during systole. Rather, there is relative accumulation in the autophosphorylated E1P/E2P intermediates that precede rate-limiting steps in its enzymatic cycle (36, 39, 40). These states are outlined with red boxes in **Fig. 2A**.

To determine the relative affinity of both micropeptides for these and other key SERCA enzymatic states, we transfected HEK-293 cells with Cerulean (Cer)-labeled SERCA2a (FRET donor) and yellow fluorescent protein (YFP)-labeled PLB (FRET acceptor) and quantified the interaction of these proteins using acceptor sensitization FRET microscopy. To control the conformational poise of SERCA, cells were permeabilized with 0.05 mg/mL saponin in bath solutions appropriate for stabilization of the transporter in various conformations (*see Methods*, **Fig. S1**). The affinity of the PLB-SERCA interaction was quantified by measuring FRET with automated fluorescence microscopy, as previously described (34, 41). FRET was low in cells with low fluorescence (low protein expression), increasing to a maximum in the brightest cells (high protein expression), yielding a FRET based “binding curve” (**Fig. 2B**). A hyperbolic fit to the data yielded the maximal FRET efficiency at high protein concentration or  $\text{FRET}_{\text{max}}$  (representing the intrinsic FRET of the bound PLB-SERCA complex) and the apparent dissociation constant ( $K_D$ ), the protein concentration that yields half-maximal FRET efficiency. The  $K_D$  value is inversely related to the affinity of the PLB-SERCA complex. **Figure 2B** shows the conditions that yielded the greatest difference in relative  $K_D$  for the PLB regulatory complex. PLB bound to the E1-ATP state of SERCA is obtained with a solution containing 3 mM ATP and low  $\text{Ca}^{2+}$ , and represents the prevailing conformation in resting (diastolic) conditions. Addition of thapsigargin (TG) resulted in a significant right-shift of the binding curve ( $p = 8 \times 10^{-3}$ ) (**Table S1**), indicating a decrease in PLB-SERCA affinity. Reduced affinity of PLB for TG-inhibited SERCA is consistent with previous observations from our lab (22) and others (19).

The summary of fitting of binding curves obtained from 6 independent transfections for each of 8 conditions is shown in **Fig. 2C-D** and **Table 1** (**Fig. S2** and **S3**). We observed especially avid binding of PLB to the E1-ATP state, which may indicate stabilization of that conformation of SERCA. This is the state that most SERCA pumps are in during the diastolic phase of the cardiac cycle when cytoplasmic  $\text{Ca}^{2+}$  is low, the muscle is relaxed, and the heart is filling with blood. The affinity of PLB for this state was not altered over a range of pH from 6-8 (**Fig S4**), indicating no preference for “E2” or “E1” transmembrane domain conformations stabilized in acidic or alkaline pH respectively (42, 43 ).

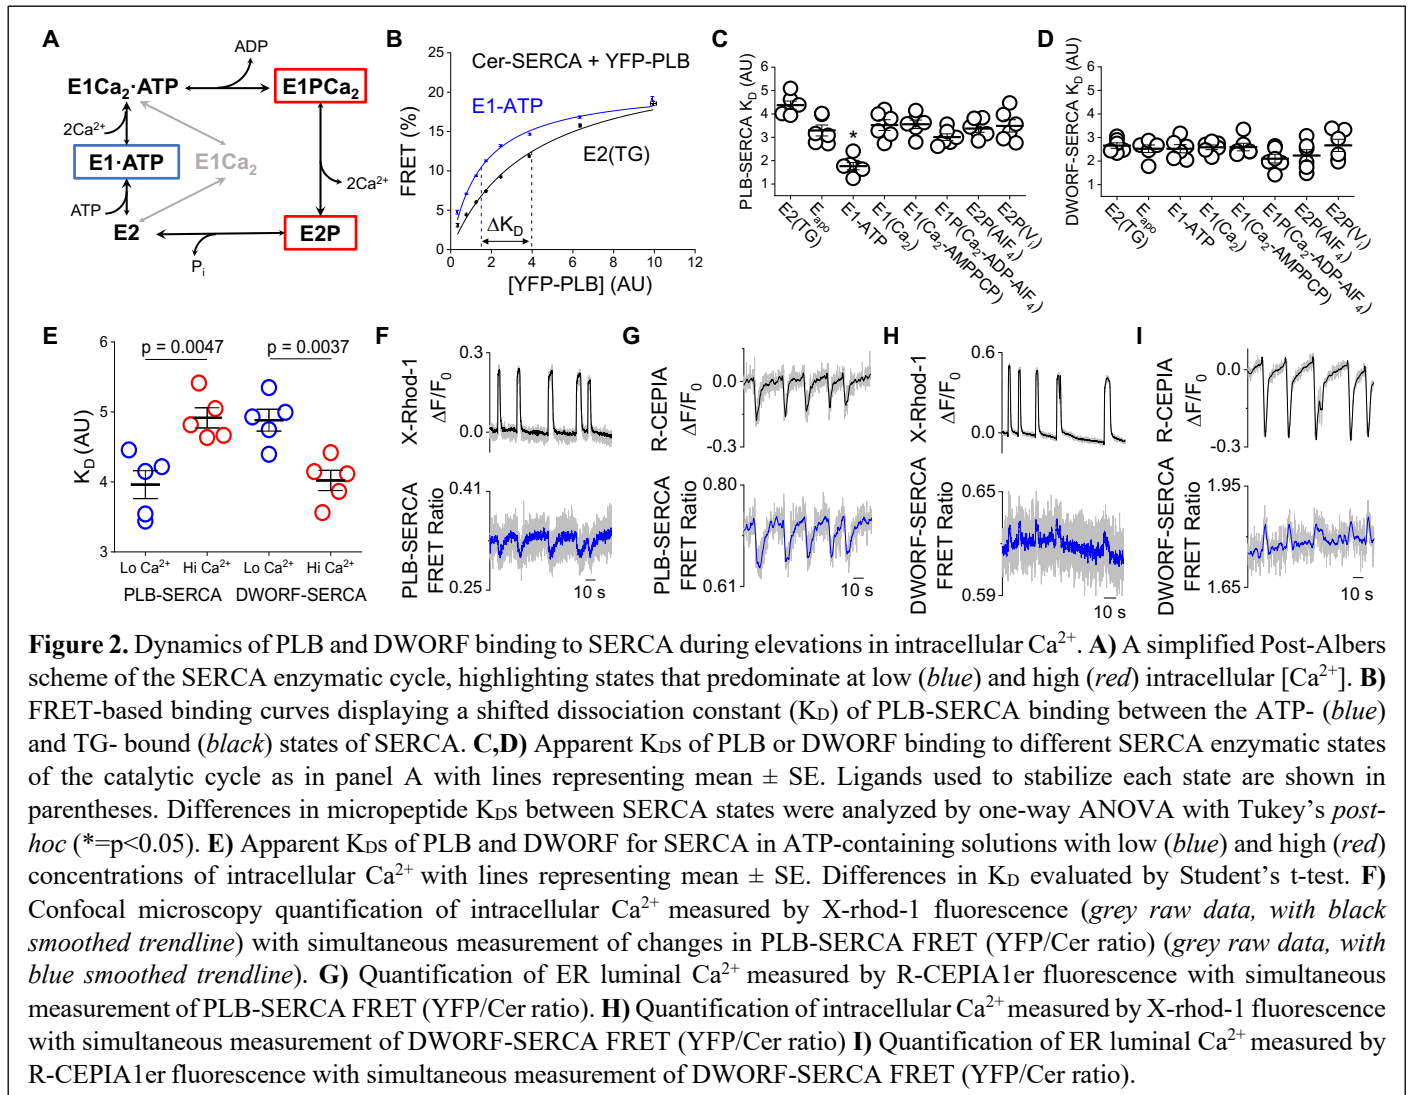

In contrast to PLB, DWORF showed a much flatter affinity profile across SERCA enzymatic states (Fig. 2D). We noted slightly lower  $K_D$  values for E1PCa and E2P states. The population of SERCA pumps increasingly accumulates in these states during the systolic phase of the cardiac cycle when cytoplasmic  $\text{Ca}^{2+}$  is elevated and the heart is contracting to eject blood. DWORF may have a preference for those conformations, though the difference was not statistically significant by one-way ANOVA (Table 1, Table S1). We did resolve statistically significant differences in PLB-SERCA and DWORF-SERCA affinities in a simpler comparison of affinities in ATP-containing solutions: low  $\text{Ca}^{2+}$  “relaxing solution” vs. a high  $\text{Ca}^{2+}$  solution that induced enzymatic cycling of SERCA (see Methods). In these physiological buffers mimicking diastole vs. systole, respectively, we observed reciprocal  $\text{Ca}^{2+}$ -dependence of binding affinity for PLB-SERCA vs. DWORF-SERCA (Fig. 2E, S5), consistent with our previous study (4).

Taken together, these data indicate that PLB and DWORF prefer to bind different SERCA conformations corresponding to different enzymatic states of the transport cycle. To determine how this differential  $\text{Ca}^{2+}$ -dependent affinity may cause dynamic shifts in PLB and DWORF binding equilibria during intracellular  $\text{Ca}^{2+}$  elevations, we exploited a cardiomimetic model system described previously (44). HEK-293 cells expressing RyR and SERCA2a show spontaneous ER  $\text{Ca}^{2+}$  release events that give rise to large, prolonged increases in cytoplasmic  $\text{Ca}^{2+}$ .  $\text{Ca}^{2+}$  transients were detected by confocal microscopy as an increase in X-rhod-1 cytoplasmic  $\text{Ca}^{2+}$  indicator fluorescence or a decrease in R-CEPIA1er ER  $\text{Ca}^{2+}$  indicator fluorescence (Fig. 2F-I, black). In some cells, these  $\text{Ca}^{2+}$  elevations coincided with small decreases in PLB-SERCA FRET, shown in Fig. 2F and G as grey data overlaid with a smoothed trendline (blue, see Methods) corresponding to a loss of PLB-SERCA affinity at elevated  $\text{Ca}^{2+}$ . These were very small changes in FRET, as expected from the small differences in affinity quantified in equilibrium experiments (Fig. 2C and E). Indeed, we were previously

unable to detect a PLB-SERCA FRET change over a single  $\text{Ca}^{2+}$  transient in electrically paced cardiac myocytes, only observing a modest decrease in average FRET over a period of repeated  $\text{Ca}^{2+}$  transients during rapid pacing (22). However, in HEK cells the  $\text{Ca}^{2+}$  elevations were more prolonged (increasing time for quantification), expression of endogenous SERCA/PLB was very low (reducing competing non-FRET interactions) and the cells are non-contractile (eliminating confounding cell motions). These advantages enabled detection of small shifts in the binding equilibria in the present study.

Next, we tested whether there was a change in DWORF-SERCA FRET in response to  $\text{Ca}^{2+}$  elevations. These FRET changes were even smaller than those observed for PLB-SERCA binding (Fig. 2H), consistent with DWORF's relatively flat affinity profile across SERCA enzymatic states (Fig. 2D). The DWORF-SERCA FRET change was easier to appreciate in experiments where a low affinity  $\text{Ca}^{2+}$  indicator localized to the ER lumen (R-CEPIA1er) was used instead of a cytoplasmic  $\text{Ca}^{2+}$  indicator dye (Fig. 2I), perhaps because ER  $\text{Ca}^{2+}$  buffering by the indicator resulted in larger amplitude  $\text{Ca}^{2+}$  release events. Interestingly, the direction of the DWORF-SERCA FRET change was the opposite of that observed for PLB-SERCA; we observed modestly *increased* FRET during  $\text{Ca}^{2+}$  transients (Fig. 2H and I), consistent with enhanced DWORF-SERCA binding affinity at elevated cytoplasmic  $\text{Ca}^{2+}$  (Fig. 2E) (4).

#### *PLB Re-association with SERCA After $\text{Ca}^{2+}$ Transients is Delayed by the PLB Pentamer*

In examining the FRET changes accompanying  $\text{Ca}^{2+}$  elevations, we noted differences in the rates of recovery of FRET signals back to baseline after each  $\text{Ca}^{2+}$  transient, suggesting different rates of exchange of DWORF and PLB from SERCA. Specifically, during  $\text{Ca}^{2+}$  transient relaxation, DWORF appeared to dissociate rapidly from SERCA, as measured by the decrease in the DWORF-SERCA FRET ratio back to basal levels (Fig. 2H and I). However, PLB-SERCA re-association displayed a noticeable lag compared to the  $\text{Ca}^{2+}$  transient relaxation, with FRET continuing to increase back toward its resting maximum for several seconds after  $\text{Ca}^{2+}$  had already stabilized at a basal level (Fig. 2F and G). Exponential decay fitting of the recovering FRET signals and  $\text{Ca}^{2+}$  decay revealed characteristic time constants ( $\tau$ ) for each process (Fig. 3, Table S2). We found that PLB-SERCA re-association was significantly slower ( $\tau = 4.9 \pm 0.6$  s) than the  $\text{Ca}^{2+}$  decay time ( $\tau = 1.6 \pm 0.2$  s,  $p = 2 \times 10^{-8}$ ) (Fig. 3A, Table S3). While the amplitude of the  $\text{Ca}^{2+}$ -dependent DWORF-SERCA FRET change was very small (Fig. 2H and 3B) due to its relatively flat affinity profile (Fig. 2D) we were able to quantify DWORF-SERCA unbinding ( $\tau = 1.2 \pm 0.4$  s) and found it was similar to the  $\text{Ca}^{2+}$  transient relaxation time (Fig. 3B). Fig. 3D compares the rates of PLB-SERCA and DWORF-SERCA binding equilibrium shifts, expressed as the difference between the  $\text{Ca}^{2+}$  relaxation and the corresponding recovery of the FRET signal.

To understand the unexpectedly slow rate of PLB-SERCA re-binding, we considered whether the rate of PLB-SERCA recovery could be limited by slow dissociation of PLB protomers from the PLB pentamer (28, 29). To observe  $\text{Ca}^{2+}$ -dependent changes in PLB oligomeric interactions, we transfected cells with Cer-PLB and YFP-PLB to measure intra-pentameric FRET. PLB-PLB FRET increased rapidly during  $\text{Ca}^{2+}$  elevations inversely to what was observed for PLB-SERCA FRET, indicating that PLB displaced from SERCA are redistributed into pentamers (Fig. S6). Notably, PLB-PLB FRET relaxation (pentamer unbinding) displayed a

| Enzymatic State  | Stabilizing Ligand(s)                  | PLB-SERCA         |                         | DWORF-SERCA |                         |
|------------------|----------------------------------------|-------------------|-------------------------|-------------|-------------------------|
|                  |                                        | $K_D$ (AU)        | FRET <sub>max</sub> (%) | $K_D$ (AU)  | FRET <sub>max</sub> (%) |
| E2               | TG                                     | 4.4 ± 0.2         | 26 ± 0.8                | 2.7 ± 0.1   | 28 ± 0.5                |
| E <sub>apo</sub> |                                        | 3.3 ± 0.2         | 25 ± 0.9                | 2.5 ± 0.2   | 29 ± 1.1                |
| E1-ATP           | ATP                                    | <b>1.8 ± 0.2*</b> | 22 ± 0.3                | 2.5 ± 0.2   | 29 ± 1.4                |
| E1               | $\text{Ca}^{2+}$                       | 3.5 ± 0.2         | 26 ± 0.9                | 2.6 ± 0.1   | 29 ± 0.7                |
| E1               | $\text{Ca}^{2+}$ -AMPPCP               | 3.6 ± 0.2         | 26 ± 0.8                | 2.6 ± 0.2   | 29 ± 1.6                |
| E1P              | $\text{Ca}^{2+}$ -ADP-AIF <sub>4</sub> | 3.0 ± 0.1         | 22 ± 0.9                | 2.1 ± 0.2   | 25 ± 0.8                |
| E2P              | AIF <sub>4</sub>                       | 3.4 ± 0.2         | 24 ± 0.9                | 2.2 ± 0.3   | 27 ± 1.0                |
| E2P              | V <sub>i</sub>                         | 3.5 ± 0.3         | 26 ± 0.8                | 2.7 ± 0.3   | 31 ± 2.1                |

**Table 1.** Acceptor-sensitization FRET binding curve parameters. Data are reported as mean ± SE. Differences were determined by one-way ANOVA with Dunn's *post-hoc* (\* =  $p < 0.05$ , See Table S1 for complete statistical analysis).

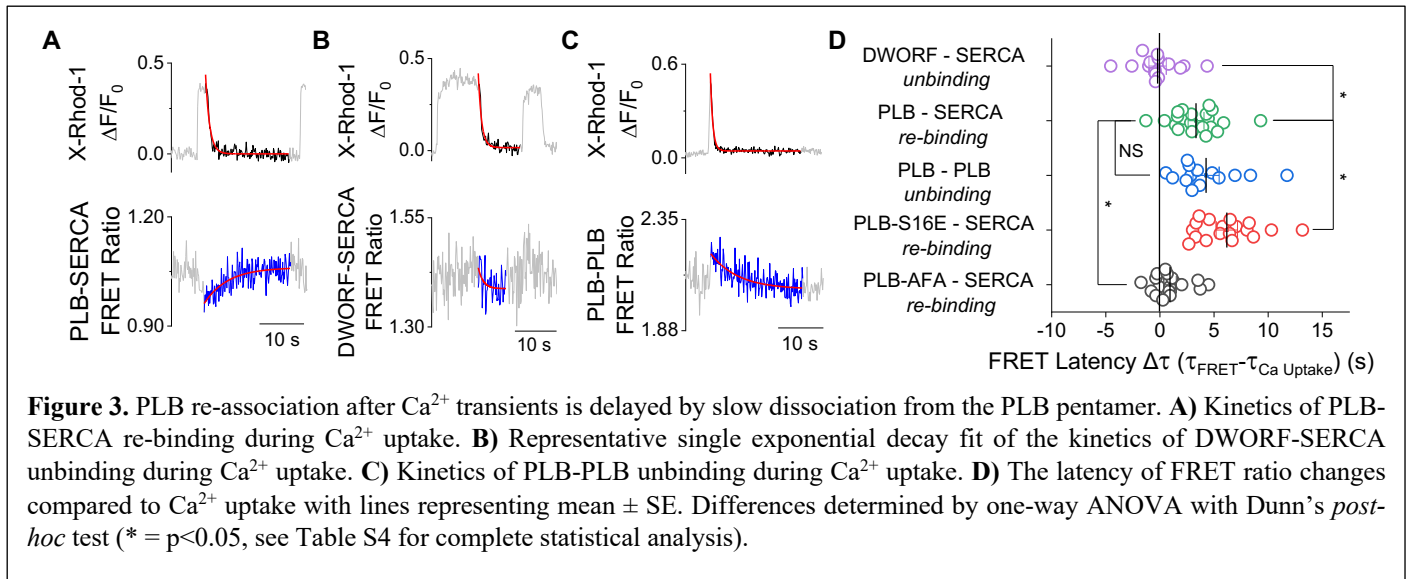

slow time course ( $\tau = 5.2 \pm 0.8$  s) (**Fig. 3C**) that closely matched the slow PLB-SERCA re-association ( $4.9 \pm 0.6$  s) (**Fig. 3D**). The data suggested PLB pentamer dissociation is indeed rate-limiting for re-binding of PLB to SERCA. Based on this observation, we predicted that PLB-SERCA re-binding rate would be changed by altering the stability of the PLB pentamer with mutagenesis. PLB pentamers are stabilized by PKA phosphorylation of serine 16 of PLB (27) during physiological stress, and this effect can be mimicked with S16E mutation (23). As predicted, stabilization of pentameric interactions with S16E mutation resulted in even slower PLB-SERCA re-association ( $\tau = 8.6 \pm 0.7$  s,  $p = 2 \times 10^{-6}$ ) (**Fig. 3D** and **S6, Table S3**). Conversely, when the PLB pentamer was destabilized by alanine substitutions of 3 transmembrane cysteines (PLB-AFA) (8), PLB-SERCA re-association was significantly accelerated ( $\tau = 2.5 \pm 0.5$  s,  $p = 8 \times 10^{-3}$ ) (**Fig. 3D**, and **S6, Table S3**). The kinetics of SERCA binding/unbinding PLB and DWORF during  $\text{Ca}^{2+}$  uptake are summarized in Supplementary **Figure S7** and **Table S2**. Taken together, these results support the hypothesis that PLB oligomerization is the cause of the delayed re-association of the dynamic fraction of PLB monomers with SERCA after  $\text{Ca}^{2+}$  elevation. Moreover, the exaggerated delay of PLB re-association with SERCA after S16E mutation suggests an adaptive physiological mechanism. Adrenaline-induced phosphorylation of PLB serine 16 may enhance the kinetic trapping (temporal buffering) of PLB monomers in pentamers *in-vivo* after adrenergic stimulation in conditions of physiologic stress.

We also investigated shifts in regulatory binding equilibria during the upstroke of the  $\text{Ca}^{2+}$  transient. This phase of the transient was too fast for adequate sampling using the previous confocal microscopy acquisition rate (7 images/sec), so we used a faster microscope to achieve an acquisition rate of 42 images/sec (*see Methods*). DWORF-SERCA binding occurred with a time course that was similar to that of  $\text{Ca}^{2+}$  release ( $\tau = 0.22 \pm 0.03$  s and  $0.21 \pm 0.03$  s, respectively) (**Fig. S8** and **Table S5**). However, PLB-SERCA unbinding was slower ( $\tau = 0.74 \pm 0.14$  s), significantly lagging behind the  $\text{Ca}^{2+}$  upstroke ( $p = 4 \times 10^{-8}$ ) (**Fig. S8** and **Table S5-7**). Likewise, we observed significantly slower PLB-PLB binding ( $\tau = 0.59 \pm 0.04$  s) vs.  $\text{Ca}^{2+}$  release ( $p = 2 \times 10^{-4}$ ) (**Fig S8** and **Table S5-7**) that was similar to PLB-SERCA unbinding time. The data suggest PLB-SERCA unbinding may be rate-limiting for subsequent PLB oligomerization during  $\text{Ca}^{2+}$  elevations.

### Modeling the Redistribution of PLB and DWORF Regulatory Complexes

The spontaneous  $\text{Ca}^{2+}$  elevations in HEK cells expressing RyR and SERCA2a are less frequent and longer in duration than cardiac  $\text{Ca}^{2+}$  transients, so we developed a computational model to integrate the measured rates of the dynamic interactions of PLB and DWORF with SERCA on the timescale of the cardiac cycle. The purpose of this model was to simulate the dynamic redistribution and exchange of regulatory species on a beat-to-beat basis and on the longer timescale between rest and exercise. The model describes the kinetics of these regulatory interactions with a set of numerically solved ordinary differential equations (*see Supplemental Methods*). A genetic algorithm was used to fit mean rate constants for the forward and reverse reactions in the model from experimentally measured FRET data as previously described (45). For simplicity,

we considered the population of SERCA pumps to be distributed between two ensembles of pump enzymatic states, representing the “diastolic” condition (Ca-free) and the “systolic” condition (Ca-bound), as diagrammed in **Fig. 4A**. The relative population of these two ensemble states is dependent on the relative concentration of  $\text{Ca}^{2+}$ , as quantified by confocal microscopy experiments. Monomeric PLB ( $\text{PLB}_1$ ) can bind either the Ca-free or Ca-bound ensemble of SERCA (22), but with higher affinity for the Ca-free population (**Fig. 2E**). The relative affinity of PLB for SERCA was constrained to be 2-fold higher for Ca-free vs. Ca-bound ensembles, as determined experimentally from FRET binding curves (**Fig. 2C**) (4). Monomeric PLB ( $\text{PLB}_1$ ) is also in equilibrium with the pentameric population ( $\text{PLB}_5$ ). The relative affinity of DWORF for SERCA was constrained to increase by 25% between Ca-free and Ca-bound ensembles, consistent with FRET measurements (**Fig. 2D**) (4). The computed kinetic parameters are provided in the Supplemental Data (**Table S8** and **S9**).

### *Dynamic Responses to $\text{Ca}^{2+}$ Transients*

The computational model provided good descriptions of data from physical experiments showing time-dependent changes in PLB-SERCA FRET and cytoplasmic  $\text{Ca}^{2+}$  (measured simultaneously). **Fig. 4B** provides a best-fit model prediction of the FRET compared to a representative experimental measurement. The model captured the rapid reduction of FRET with the rise of the  $\text{Ca}^{2+}$  transient. The decrease in PLB-SERCA is followed by a slower restoration of the FRET as  $\text{Ca}^{2+}$  returns to baseline. The similarity of the predicted and experimentally measured FRET data suggests that the model appropriately represents key aspects of the PLB-SERCA regulatory complex binding dynamics.

Using these fit parameter values, we simulated the time-dependent changes in PLB-SERCA and PLB-PLB binding dynamics that we observed in HEK cells. Importantly, we observed that a majority of the PLB-SERCA regulatory complexes remained intact (**Fig. 4C**, purple) during a  $\text{Ca}^{2+}$  elevation (**Fig. 4C**, grey shaded region), consistent with the “subunit model” (46). Thus, PLB can remain bound to SERCA when SERCA is bound to  $\text{Ca}^{2+}$ ; this  $\text{Ca}^{2+}$ -bound PLB-SERCA fraction is highlighted in **Fig. 4C** (red). However, a fraction of the population of PLB-SERCA dissociated during a  $\text{Ca}^{2+}$  transient (**Fig. 4C**, purple). This fraction comprised ~30% of PLB-SERCA complexes under these simulation conditions. This shift impacted the PLB monomer/pentamer equilibrium (**Fig. 4C**, blue/green). Expectedly, there was very little observed change in the small population of PLB monomers, as the dynamic fraction was quickly incorporated into pentamers. These reciprocal shifts are the cause of the transient decrease in SERCA-PLB FRET and increase in PLB-PLB FRET observed by confocal microscopy (**Fig. 3A** and **C**).

Next, we simulated the shorter, faster  $\text{Ca}^{2+}$  transients observed in the heart, pacing at a range of frequencies from 60 to 180 beats per minute, to investigate regulatory dynamics under conditions of rest, moderate exercise, and intense exercise. Increasing pacing frequency progressively decreased PLB-SERCA binding (**Fig. 4D, E**) and increased accumulation of PLB in pentamers (**Fig. 4F**). The systole-diastole difference in PLB-SERCA binding was small. This oscillation became even smaller with increasing pacing frequency (**Fig. 4D, G**), as the shifts in binding equilibria began to lag behind the rapid  $\text{Ca}^{2+}$  changes. These results suggest that the exchange dynamics of PLB may impact adaptive SERCA regulation between resting and exercising heart rates.

Introduction of DWORF-SERCA interactions to the model yielded the expected effect of competition of DWORF and PLB for SERCA binding (**Fig 4A, Table S9**). Increasing the amount of DWORF relative to PLB decreased PLB-SERCA binding (**Fig. 4H** and **I**) and increased PLB oligomerization (**Fig. 4J**). DWORF competes potently with PLB even at low stoichiometry because oligomerization of PLB reduces the effective concentration of the active monomeric species. Interestingly, the  $\text{Ca}^{2+}$ -dependent increase in DWORF affinity for SERCA exaggerated the oscillations in PLB-SERCA binding during pacing (**Fig. 4K**). That is, during  $\text{Ca}^{2+}$  elevations DWORF (which binds SERCA better at high  $\text{Ca}^{2+}$ ) increasingly displaced PLB (which binds SERCA better at low  $\text{Ca}^{2+}$ ).

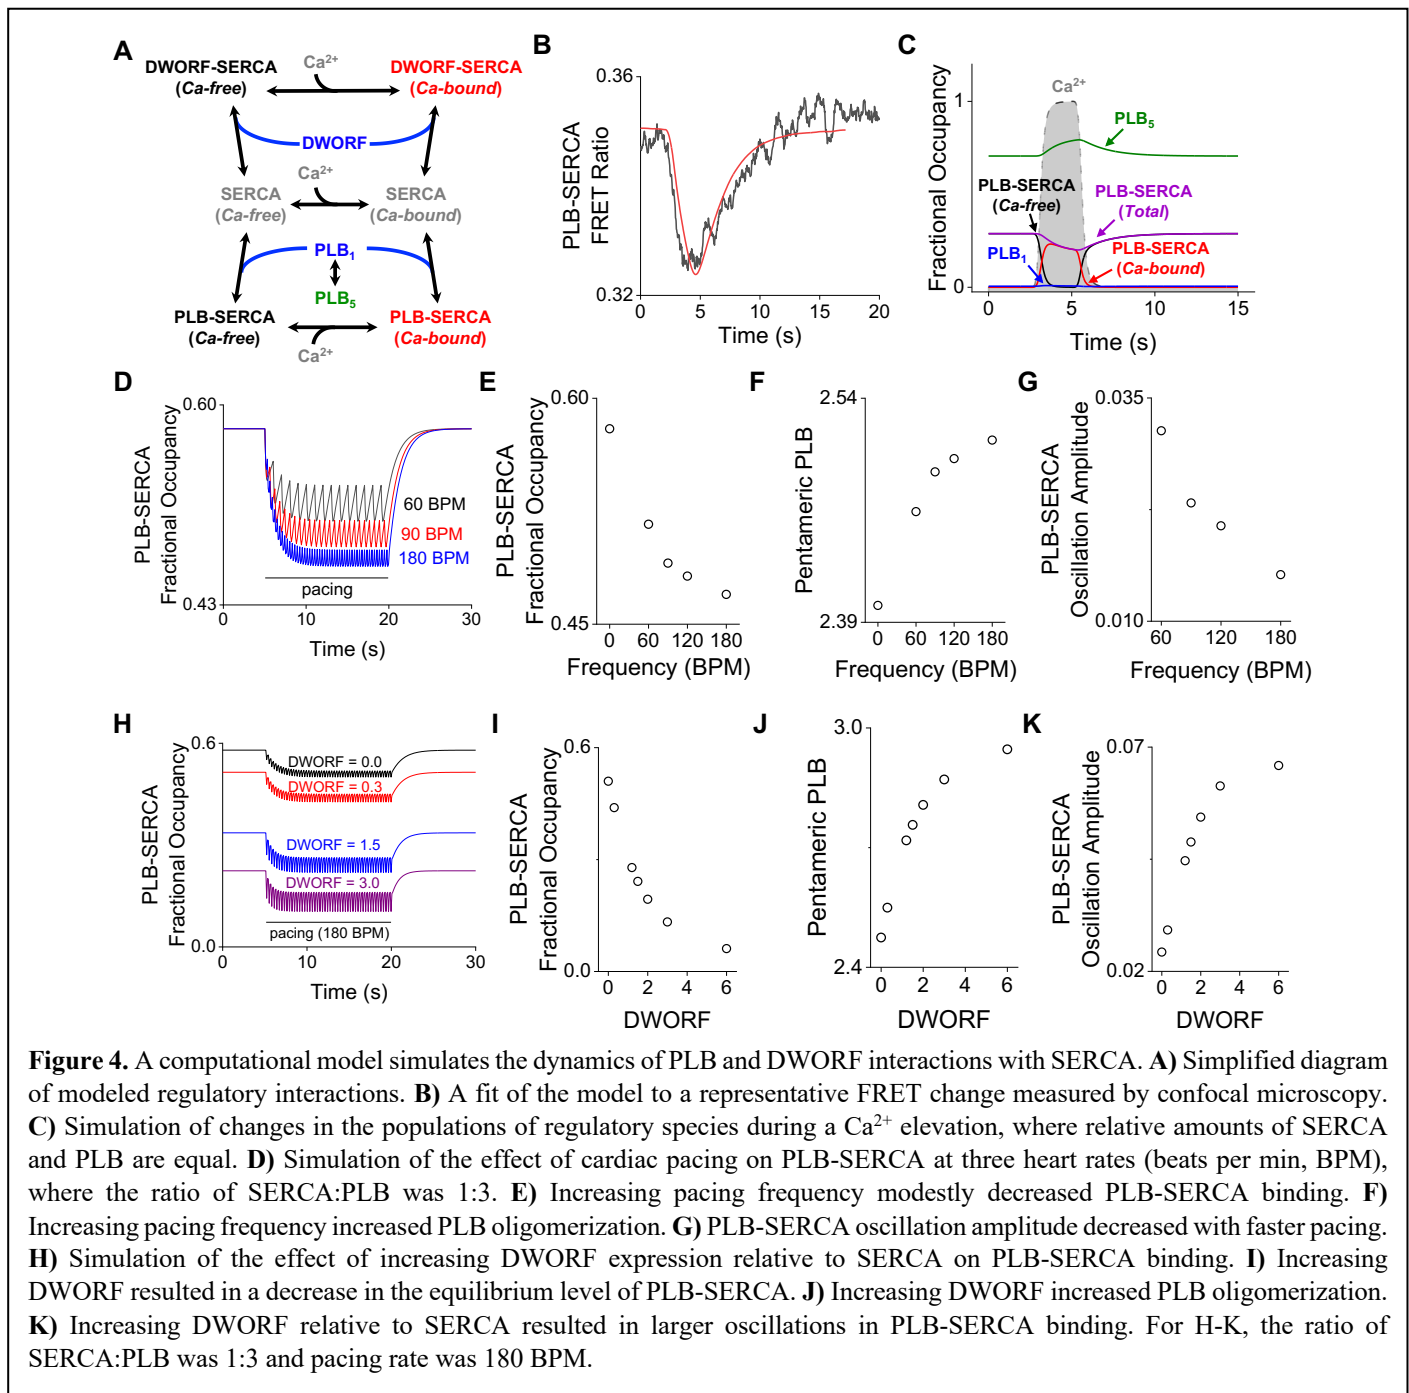

## DISCUSSION

*Differential  $\text{Ca}^{2+}$ -dependence of micropeptides for SERCA-* The principal finding of the present study is that the opposite  $\text{Ca}^{2+}$ -dependence of DWORF and PLB binding to SERCA (4) (**Fig. 2E**) is due to differential affinity of these competing micropeptides for particular enzymatic states in the transport cycle (**Fig. 2C** and **2D**). The FRET-based binding assay showed that PLB has the highest affinity for the E1-ATP state, which is the predominant state at resting  $\text{Ca}^{2+}$  when the cardiac muscle is relaxed and the ventricle is filling with blood (cardiac diastole). We consider micropeptide-SERCA binding affinity to be indicative of the relative energetics of the PLB-SERCA complex, much as melting temperature may be quantified as a proxy for the stability of a protein-protein complex (47). Stabilization of the E1-ATP structure is expected to favor the population of that state, slowing the subsequent  $\text{Ca}^{2+}$ -binding step. This is expected to reduce the apparent  $\text{Ca}^{2+}$  affinity of the



pump and pump turnover, the principal inhibitory effects of PLB on SERCA (12). In contrast, DWORF shows a much flatter SERCA-binding profile, with more avid binding to E1P and E2P states. Much of the SERCA population accumulates in these states when cytoplasmic  $\text{Ca}^{2+}$  is elevated and the heart is contracting to eject blood (cardiac systole). This accumulation occurs during rapid  $\text{Ca}^{2+}$  transport as a result of rate-limiting steps in the enzymatic cycle (39, 40) that create “traffic jams”. There are two mechanistic implications of the observed tight binding of DWORF to these states. If DWORF stabilizes these states (or adjacent intermediates) it may reduce an activation energy barrier that limits the kinetics of these enzymatic transitions. This could accelerate pump turnover, an effect that would be in harmony with recent studies that suggest a direct *stimulatory* effect of DWORF on SERCA ATPase activity and  $\text{Ca}^{2+}$  uptake rate (4, 5, 32). Secondly, DWORF may compete more effectively for SERCA-binding during cytoplasmic  $\text{Ca}^{2+}$  elevations, increasingly displacing inhibitory PLB and exaggerating the dynamic fraction that unbinds at high  $\text{Ca}^{2+}$ . Dynamic competition of these regulatory peptides is noteworthy, since the discovery of DWORF raised the question of why SERCA regulation should involve both an inhibitor (PLB) and an inhibitor of the inhibitor (DWORF). This seems cumbersome if the mechanistic goal is simply more or less  $\text{Ca}^{2+}$  transport activity. We reasoned that the interplay of these opposing regulators must be necessary for responsiveness to changing conditions. This could include reacting to transient  $\text{Ca}^{2+}$  changes during the cardiac cycle or on a longer timescale, responding to adrenergic signaling and changes in pacing frequency during exercise. The present data provide insight into  $\text{Ca}^{2+}$  transport regulation on both timescales:

*Functional implications of beat-to-beat micropeptide exchange-* The opposite  $\text{Ca}^{2+}$ -dependence of SERCA binding to DWORF and PLB (4) (**Fig. 2C-E**) is noteworthy in the context of cardiac physiology. Importantly, PLB-SERCA complexes do not dissociate *en masse* during systole (**Fig. 4D**); we have previously reported that elevated  $\text{Ca}^{2+}$  causes only small shifts in regulatory complex binding equilibria (4, 22). Still, cardiac  $\text{Ca}^{2+}$  transients simultaneously reduce PLB binding affinity and favor DWORF binding, driving a “dynamic fraction” of the population of these micropeptides to exchange from SERCA during each  $\text{Ca}^{2+}$  transient. The functional impact of this exchange is expected to be an exaggeration of the intrinsic response of SERCA to changing  $\text{Ca}^{2+}$ . That is, during diastole the already low SERCA activity is further inhibited by an increase in the fraction of pumps that bind PLB (**Fig. 2F and G**). During systole, high SERCA activity is further boosted by enhanced DWORF binding (**Fig. 2H and I**), which increasingly displaces PLB and directly stimulates SERCA maximal activity (4, 32). Together, low  $\text{Ca}^{2+}$  inhibition and high  $\text{Ca}^{2+}$  stimulation should enhance the apparent cooperativity of the  $\text{Ca}^{2+}$  response, which would benefit cardiac function by conserving ATP consumption until  $\text{Ca}^{2+}$  transport is most efficient and most necessary.

A second anticipated effect of dynamic competition of the micropeptides is a phase shift of the SERCA activation/inhibition cycle relative to cytoplasmic  $\text{Ca}^{2+}$  oscillations. Specifically, while PLB-SERCA unbinding is relatively fast, we did observe a modest delay between  $\text{Ca}^{2+}$  release and unbinding of the dynamic fraction of PLB (**Fig. S8**) suggesting this inhibitory interaction persists briefly during the initial rise in  $\text{Ca}^{2+}$ . Thus, slow dissociation of the dynamic fraction of PLB transiently protects the micropeptide binding site from DWORF. Consequently, in the presence of a slowly dissociating dynamic fraction of PLB, full SERCA stimulation by DWORF also lags in time compared to the  $\text{Ca}^{2+}$  upstroke. Together, a persistent fraction of PLB and a lagging DWORF transiently decrease SERCA activity compared to the level of transport that would be supported by that level of  $\text{Ca}^{2+}$  under equilibrium conditions. The functional consequence of this lag is to prevent  $\text{Ca}^{2+}$  uptake from opposing  $\text{Ca}^{2+}$  release early in systole. This is expected to increase the amplitude and rate of rise of  $\text{Ca}^{2+}$  transient and minimize futile cycling of the pump at peak  $\text{Ca}^{2+}$ , thereby conserving ATP resources. Conversely, during the onset of diastole, kinetic trapping of PLB in slowly dissociating PLB pentamers (**Fig. 3C**) results in a significant lag between the  $\text{Ca}^{2+}$  transient decay and rebinding of PLB to SERCA (**Fig. 3A**). Slow rebinding of PLB to SERCA is expected to prolong elevated SERCA activity, making the  $\text{Ca}^{2+}$  decline steeper and yielding a lower concentration of cytoplasmic  $\text{Ca}^{2+}$  during diastole.

*Micropeptide dynamics during rest and exercise-* The observations presented here also have implications for the cardiac stress response. During the transition from rest to exercise, cardiac  $\text{Ca}^{2+}$  handling accelerates in response to more frequent  $\text{Ca}^{2+}$  elevations (increased heart rate) and adrenergic stimulation (PLB

phosphorylation). The slow kinetics of PLB exchange from pentamers means that faster pacing should integrate more pentameric PLB at the expense of the population of PLB-SERCA (**Fig. 4D**). Thus, one may speculate that this mechanism contributes to a positive force-frequency relationship (treppe) (48). Moreover, during exercise, oligomerization is secondarily enhanced by PLB phosphorylation by PKA, which further slows the unbinding of PLB from oligomers during diastole (**Fig. 3D**). This would be reinforced by CaMKII activation by elevated  $\text{Ca}^{2+}$  during fast pacing. Interestingly, computational modeling showed that competitive binding of SERCA by DWORF decreases both the basal level of PLB-SERCA binding as previously proposed (30) and also increases the amplitude of the oscillations in the population of the PLB-SERCA complex (**Fig. 4I-K**). The dose-dependence of these effects revealed in the computational model may provide insight into DWORF-based gene therapy approaches.

*Summary and Future Directions-* Dynamic competition of regulatory micropeptides on seconds and minutes timescales represents an important aspect of the responsiveness of SERCA regulation to  $\text{Ca}^{2+}$  transients and PLB phosphorylation, respectively. The data also clarify the role of the PLB pentamer as a phosphorylation-tunable kinetic trap that limits the rate of SERCA-rebinding by a dynamic fraction of PLB. Future studies will elucidate the functional predictions derived from the present results, specifically: DWORF enhances the E1P-E2P transitions in the SERCA enzymatic cycle; DWORF increases SERCA cooperativity in the presence of PLB; DWORF increases the small fraction of PLB that binds/unbinds SERCA with each  $\text{Ca}^{2+}$  elevation, exaggerating the SERCA inhibition/stimulation cycle; DWORF causes a phase shift in the SERCA inhibition/stimulation cycle relative to the cardiac  $\text{Ca}^{2+}$  oscillations. Overall, the results suggest the importance of dynamic competition of PLB and DWORF for cardiac function and may provide insight into the interplay of other tissue-specific micropeptide regulators of ion transporters more generally.

## ACKNOWLEDGEMENTS

The authors thank Howard S. Young, Gianluigi Veglia, J. Michael Autry, Daniel Koch, Catherine Makarewich, and L. Michel Espinoza-Fonseca for helpful discussions. The authors thank Elisa Bovo and Aleksey Zima for technical assistance. The authors thank L. Michel Espinoza-Fonseca for providing the minimized structures in Fig. 1. This investigation was supported by the National Institutes of Health (NIH): Maximizing Investigators' Research Awards (MIRA) R35GM124977 from the National Institute of General Medical Sciences (NIGMS) to PK-H; MIRA R35GM138183 from NIGMS and K22HL133150 from the National Heart, Lung, and Blood Institute (NHLBI) to JB; R01HL092321 and R01HL143816 from the NHLBI to SLR.

## METHODS

### *Plasmid Constructs*

For all plasmid constructs, we used pEGFP-C1 as the expression vector in mammalian cells. All micropeptides (PLB, DWORF, PLB-AFA, and PLB-S16A) and SERCA constructs consisted of mCerulean3, EYFP, or TagRFP fused via a 5 amino acid linker to the N-terminus of the micropeptide or SERCA (28, 33, 49).

### *Cell culture and transfection*

AAV 293 cells were cultured in DMEM cell culture medium supplemented with 10% fetal bovine serum (FBS) (ThermoScientific, Waltham, MA). Following culture, the cells were transiently transfected using either MBS mammalian transfection kit (Agilent Technologies, Stratagene, La Jolla, CA) or Lipofectamine 3000 transfection kit (Invitrogen, Carlsbad, CA) as per instructions provided with the respective kits. 24 hours post-transfection the cells were trypsinized (ThermoScientific, Waltham, MA) and replated onto poly-D-lysine coated glass bottom chambers and allowed to settle down for one hour before imaging. We have previously estimated that this approach achieves endoplasmic reticulum protein expression levels on the order of 2000:1 or 4000:1 lipids:protein ratio (50), vs. 750:1 lipid:protein ratio quantified for native sarcoplasmic reticulum (46, 51). Thus, native protein concentrations are 3-5 fold more concentrated and we do not consider this heterologous model to represent "overexpression" of SR proteins.

### *FRET Acceptor Sensitization in Permeabilized HEK-293 cells*

Acceptor sensitization FRET was quantified as previously described (22). Briefly, AAV 293 cells were transiently transfected with Cer-donor and YFP-acceptor labeled FRET binding partners in a 1:5 molar plasmid ratio, and FRET acceptor sensitization was measured by automated fluorescence microscopy before and after permeabilization with 0.005% w/v saponin. For each condition, 2 sets of 72 images (~500 total cells per condition) were collected from six independent experiments with a 20X 0.75 N.A. objective with 50 ms exposure for each channel: Cer, YFP, and FRET (Cer excitation/ YFP emission). Cells that expressed Cer, had an area of 136-679  $\mu\text{m}^2$ , and were at least 40% circular were automatically scored for Cer, YFP, and FRET fluorescence intensity with a rolling background subtraction using a plugin in ImageJ. FRET efficiency was calculated according to  $E = G/(G + 2.782 \times F_{Cer})$ , where  $G = F_{FRET} - a \times F_{YFP} - d \times F_{Cer}$ , where  $F_{FRET}$ ,  $F_{YFP}$ , and  $F_{Cer}$  are the fluorescence intensities from FRET, YFP, and Cer images, respectively, and  $G$  represents FRET intensity corrected for the bleedthrough of the channels. The parameters  $a$  and  $d$  are bleedthrough constants calculated as  $a = F_{FRET}/F_{YFP}$  for a control sample transfected only with YFP-SERCA and  $d = F_{FRET}/F_{Cer}$  for a control sample transfected only with Cer-SERCA. For our experimental setup,  $a$  and  $d$  were 0.185 and 0.405 respectively. FRET efficiency for each scored cell was plotted as a function of expressed protein concentration, as determined from the fluorescence intensity of the yellow fluorescent protein channel (34, 41). FRET was low in cells with low fluorescence (low protein expression), increasing to a maximum in the brightest cells (high protein expression), yielding a FRET based “binding curve”. The data were fit to a hyperbolic function of the form  $[FRET = FRET_{max} [YFP]/(K_D + [YFP])]$ , where  $FRET_{max}$  is the maximal FRET efficiency at high protein concentration (representing the intrinsic FRET of the bound complex),  $[YFP]$  is inferred from YFP fluorescence emission in each cell, and  $K_D$  is the apparent dissociation constant (the protein concentration that yields half-maximal FRET efficiency).

To control the conformational poise of SERCA, cells were permeabilized with 0.05 mg/mL saponin in bath solutions appropriate for stabilization of the transporter in various conformations. Solutions for ligand-stabilization of enzymatic intermediate states were prepared by addition of corresponding substrates to a calcium-free base solution, which includes 100 mM KCl, 5 mM  $\text{MgCl}_2$ , 2mM EGTA, and 10 mM imidazole, pH 7.0. The base solution was used to characterize SERCA in a ligand-free state,  $E_{apo}$ . The following ligands were used to prepare specific solutions corresponding to SERCA biochemical state: 100  $\mu\text{M}$  thapsigargin for E2(TG); 3 mM ATP for E1-ATP; 2.1 mM  $\text{CaCl}_2$  for E1( $\text{Ca}_2$ ) with free $[\text{Ca}^{2+}]_i = 100 \mu\text{M}$  (52); 2.1 mM  $\text{CaCl}_2$  and 500  $\mu\text{M}$  nonhydrolyzable ATP analog (AMPPCP) for E1( $\text{Ca}_2$ -AMPPCP); 2.1 mM  $\text{CaCl}_2$ , 500  $\mu\text{M}$  ADP, 50  $\mu\text{M}$   $\text{AlCl}_3$ , and 3 mM KF for E1( $\text{Ca}_2$ -ADP- $\text{AlF}_4^-$ ); 0.1 mM orthovanadate for E2(Vi); and 50  $\mu\text{M}$   $\text{AlCl}_3$  and 3 mM KF for E2( $\text{AlF}_4^-$ ). Concentrations of AMP-PCP nucleotide analog and ADP nucleotide were reduced from previously published conditions (3 mM) used to stabilize SERCA in microsomal fractions (36) in order to prevent altering fluorescent protein emission intensity. The data for each set of binding partners were analyzed for differences in  $K_D$  between buffer conditions using a one-way ANOVA with Tukey’s *post-hoc* test (significance =  $p < 0.05$ ).

For experiments measuring PLB binding preference for SERCA enzymatic states E2-ATP and E1-ATP, which are in equilibrium under low  $\text{Ca}^{2+}$ , high ATP conditions (e.g. cardiac diastole), a buffer containing 100 mM KCl, 5 mM  $\text{MgCl}_2$ , 2mM EGTA, 10 mM imidazole, and 3 mM ATP was prepared. The pH was then adjusted to the following concentrations: pH = 6.0, 6.5, 7.0, 7.5, and 8.0. For these experiments, a TagRFP-PLB acceptor construct ( $\text{pK}_a = 3.8$ ) was used in place of the YFP-PLB acceptor because YFP fluorescence is sensitive to pH changes in this range ( $\text{pK}_a = 6.9$ ) (53).

For experiments with low and elevated intracellular  $[\text{Ca}^{2+}]_i$ , solutions were prepared containing potassium aspartate 120 mM, KCl 15 mM,  $\text{KH}_2\text{PO}_4$  5 mM,  $\text{MgCl}_2$  0.75 mM, dextran 2%, ATP 5 mM, HEPES 20 mM, and EGTA 2 mM, pH 7.2. The elevated  $[\text{Ca}^{2+}]_i$  buffer was prepared with  $\text{CaCl}_2$  1.7 mM for a free  $[\text{Ca}^{2+}]_i = 2 \mu\text{M}$  (52). The data for each set of binding partners were analyzed for differences in  $K_D$  between high and low  $\text{Ca}^{2+}$  conditions using a Student’s t-test (significance =  $p < 0.05$ ).

### *Confocal fluorescence microscopy to measure intermolecular FRET and HEK-293 cytoplasmic $\text{Ca}^{2+}$*

HEK-293 cells exhibiting spontaneous  $\text{Ca}^{2+}$  oscillations were generated by transient transfection with GFP-tagged RyR2 and either Cer or unlabeled SERCA2a, and co-transfected with SERCA, PLB, PLB-AFA,

PLB-S16E, or DWORF FRET pairs tagged with Cer and YFP fluorophores. Transfected cells were cultured for 24 h and seeded into poly-D-lysine-coated glass-bottom chamber slides in Dulbecco's modified Eagle's medium plus 10% fetal bovine serum. 24 h after seeding, cell culture medium was changed with PBS (+Ca<sup>2+</sup>/+Mg<sup>2+</sup>), and experiments were conducted with a Leica SP5 laser scanning confocal microscope equipped with a 63X water objective. To observe transient changes in cytoplasmic calcium, cells were incubated with 10 μM X-Rhod-1/AM (X-Rhod) for 20 min in PBS (+Ca<sup>2+</sup>/+Mg<sup>2+</sup>). X-Rhod was excited with the 543-nm line of a He-Ne laser, and emitted fluorescence was measured at wavelength 580 nm. FRET pair fluorophores Cer and YFP were excited with the 430 and 514 nm lines of an argon laser, respectively, and emitted fluorescence was measured at wavelengths 485 ± 15 and 537 ± 15 nm, respectively. Images were acquired in line-scan with averaging of 4 every 134 ms for ~2 min.

A select set of concurrent experiments were conducted with a Zeiss LSM 880 Airyscan confocal microscope using a 40X oil immersion objective. X-Rhod was excited with the 594-nm line of a HeNe laser, and emitted fluorescence was measured at wavelength 580 nm. FRET pair fluorophores Cer and YFP were excited with the 458 nm line of an argon laser, and emitted fluorescence was measured at wavelengths 485 ± 15 and 537 ± 15 nm, respectively. Images were acquired in line-scan every 24 ms for ~2 min.

FRET ratio was determined by dividing the acceptor fluorescence by the donor fluorescence and plotted as a function of time with X-Rhod to indicate concurrent changes in [Ca<sup>2+</sup>]. FRET ratio data was smoothed using a Savitzky-Golay binomial filter with a 4.08 s averaging window. Changes in FRET ratio and X-Rhod fluorescence associated with Ca<sup>2+</sup> uptake were fit to the single-exponential decay function,  $y = A1^{-x/\tau} + y_0$  in Origin, to estimate the time constant or  $\tau$  of the change, where  $A1$  is the amplitude of change and  $y_0$  is the initial detected fluorescence. Changes in FRET ratio and X-Rhod fluorescence associated with Ca<sup>2+</sup> release were fit using the single-exponential decay function,  $y = A1^{-(x-x_1)/\tau} + y_1$ , where  $x_1$  is the time in seconds of Ca<sup>2+</sup> release, and  $y_1$  is the baseline fluorescence prior to  $x_1$ , defined by the linear function  $y = A1 + y_1$ . Differences in the characteristic time constants ( $\tau$ ) for each process were analyzed using a one-way ANOVA with Dunn's *post-hoc* test (significance =  $p < 0.05$ ).

### *Kinetic Modeling*

We implemented systems of ordinary differential equations according to the schematic provided in Fig. 4A (54). This kinetic diagram describes the populations of the SERCA states under diastolic and systolic conditions. Model parameters were informed or constrained by experimental observations where appropriate, such as the PLB dissociation rates reported in this study. Mean rates were determined by averaging over several transients from multiple cells. Kinetic parameters for PLB-SERCA binding dynamics were fit to 15 independent FRET transients, while kinetic parameters for DWORF-SERCA interactions were fit to 9 independent FRET measurements. All other parameters were assigned initial values that were subject to fitting against time-varying FRET data. The relative affinity of PLB for SERCA (here described by the rate fraction of  $k_{on}/k_{off}$ ) was constrained to be 2-fold higher for Ca-free vs. Ca-bound ensembles, as determined experimentally from FRET binding curves. Likewise, the relative affinity of DWORF for SERCA ( $k_{on}/k_{off}$ ) was constrained to increase by 25% between Ca-free and Ca-bound ensembles, consistent with FRET measurements. The ODE system was numerically solved using the *scipy* (v1.5.0) ODEINT function, using the experimentally measured intracellular Ca<sup>2+</sup> transient as an input to the model. The resulting numerically estimated PLB-SERCA population was compared against the experimentally reported FRET data by assuming that the PLB-SERCA population was proportional to the FRET efficiency. Mean-squared error between the predicted PLB-SERCA population and the FRET data was computed to assess the fit. Fitting was optimized using a genetic algorithm we developed previously (45) that reduces the mean-squared error by randomizing model parameters and selecting those that reduce error. Forward simulations of the SERCA/PLB/DWORF equilibria for the cardiac pacing experiments used simulated Ca<sup>2+</sup> transients with amplitudes and frequencies in place of those measured in HEK cells for fitting purposes. All code written in support of this publication are publicly available at <https://github.com/huskeypm/pkh-lab-analyses>.

## REFERENCES

1. Verardi R, Shi L, Traaseth NJ, Walsh N, Veglia G. Structural topology of phospholamban pentamer in lipid bilayers by a hybrid solution and solid-state NMR method. *Proc Natl Acad Sci U S A*. 2011;108(22):9101-6. Epub 2011/05/18. doi: 10.1073/pnas.1016535108. PubMed PMID: 21576492; PMCID: PMC3107283.
2. Lamberth S, Schmid H, Muenchbach M, Vorherr T, Krebs J, Carafoli E, Griesinger C. NMR Solution Structure of Phospholamban. *Helvetica Chimica Acta*. 2000;83(9):2141-52. doi: [https://doi.org/10.1002/1522-2675\(20000906\)83:9<2141::AID-HLCA2141>3.0.CO;2-W](https://doi.org/10.1002/1522-2675(20000906)83:9<2141::AID-HLCA2141>3.0.CO;2-W).
3. Fernandez-de Gortari E, Espinoza-Fonseca LM. Structural basis for relief of phospholamban-mediated inhibition of the sarcoplasmic reticulum Ca(2+)-ATPase at saturating Ca(2+) conditions. *J Biol Chem*. 2018;293(32):12405-14. Epub 2018/06/24. doi: 10.1074/jbc.RA118.003752. PubMed PMID: 29934304; PMCID: PMC6093236.
4. Fisher ME, Bovo E, Aguayo-Ortiz R, Cho EE, Pribadi MP, Dalton MP, Rathod N, Lemieux MJ, Espinoza-Fonseca LM, Robia SL, Zima AV, Young HS. Dwarf open reading frame (DWORF) is a direct activator of the sarcoplasmic reticulum calcium pump SERCA. *Elife*. 2021;10. Epub 2021/06/03. doi: 10.7554/eLife.65545. PubMed PMID: 34075877.
5. Reddy VU, Weber DK, Wang S, Larsen EK, Gopinath T, De Simone A, Robia SL, Veglia G. A Kink in DWORF Helical Structure Controls the Activation of the Sarco-plasmic Reticulum Ca<sup>2+</sup>-ATPase. *bioRxiv*. 2021:2021.05.05.442831. doi: 10.1101/2021.05.05.442831.
6. Currie S, Smith G. Enhanced phosphorylation of phospholamban and downregulation of sarco/endoplasmic reticulum Ca ATPase type 2 (SERCA 2) in cardiac sarcoplasmic reticulum from rabbits with heart failure. *Cardiovascular Research*. 1999;41(1):135-46. doi: 10.1016/s0008-6363(98)00241-7.
7. Hasenfuss G, Reinecke H, Studer R, Meyer M, Pieske B, Holtz J, Holubarsch C, Posival H, Just H, Drexler H. Relation Between Myocardial Function and Expression of Sarcoplasmic Reticulum Ca<sup>2+</sup>-ATPase in Failing and Nonfailing Human Myocardium. *Circulation Research*. 1994;75(3):434-42. doi: 10.1161/01.res.75.3.434.
8. Ha KN, Masterson LR, Hou Z, Verardi R, Walsh N, Veglia G, Robia SL. Lethal Arg9Cys phospholamban mutation hinders Ca<sup>2+</sup>-ATPase regulation and phosphorylation by protein kinase A. *Proceedings of the National Academy of Sciences*. 2010;108(7):2735-40. doi: 10.1073/pnas.1013987108.
9. Hayward C, Banner NR, Morley-Smith A, Lyon AR, Harding SE. The Current and Future Landscape of SERCA Gene Therapy for Heart Failure: A Clinical Perspective. *Human Gene Therapy*. 2015;26(5):293-304. doi: 10.1089/hum.2015.018.
10. Kranias EG, Hajjar RJ. Modulation of Cardiac Contractility by the Phospholamban/SERCA2a Regulator. *Circulation Research*. 2012;110(12):1646-7-60. doi: 10.1161/CIRCRESAHA.111.259754.
11. Greenberg B, Butler J, Felker GM, Ponikowski P, Voors AA, Desai AS, Barnard D, Bouchard A, Jaski B, Lyon AR, Pogoda JM, Rudy JJ, Zsebo KM. Calcium upregulation by percutaneous administration of gene therapy in patients with cardiac disease (CUPID 2): a randomised, multinational, double-blind, placebo-controlled, phase 2b trial. *Lancet*. 2016;387(10024):1178-789-86. doi: 10.1016/S0140-6736(16)00082-9.
12. Cantilina T, Sagara Y, Inesi G, Jones LR. Comparative studies of cardiac and skeletal sarcoplasmic reticulum ATPases. Effect of a phospholamban antibody on enzyme activation by Ca<sup>2+</sup>. *J Biol Chem*. 1993;268(23):17018-25. Epub 1993/08/15. PubMed PMID: 8349590.
13. Tada M, Kirchberger MA, Katz AM. Phosphorylation of a 22,000-dalton component of the cardiac sarcoplasmic reticulum by adenosine 3':5'-monophosphate-dependent protein kinase. *J Biol Chem*. 1975;250(7):2640-7. Epub 1975/04/10. PubMed PMID: 235523.
14. Galani-Kranias E, Bick R, Schwartz A. Phosphorylation of a 100 000 dalton component and its relationship to calcium transport in sarcoplasmic reticulum from rabbit skeletal muscle. *Biochim Biophys Acta*. 1980;628(4):438-50. Epub 1980/04/03. doi: 10.1016/0304-4165(80)90393-1. PubMed PMID: 6245711.
15. Asahi M, McKenna E, Kurzydowski K, Tada M, MacLennan DH. Physical interactions between phospholamban and sarco(endo)plasmic reticulum Ca<sup>2+</sup>-ATPases are dissociated by elevated Ca<sup>2+</sup>, but not by phospholamban phosphorylation, vanadate, or thapsigargin, and are enhanced by ATP. *J Biol Chem*. 2000;275(20):15034-8. Epub 2000/05/16. doi: 10.1074/jbc.275.20.15034. PubMed PMID: 10809745.
16. James P, Inui M, Tada M, Chiesi M, Carafoli E. Nature and site of phospholamban regulation of the Ca<sup>2+</sup> pump of sarcoplasmic reticulum. *Nature*. 1989;342(6245):90-2. Epub 1989/11/02. doi: 10.1038/342090a0. PubMed PMID: 2530454.
17. Toyoshima C, Asahi M, Sugita Y, Khanna R, Tsuda T, MacLennan DH. Modeling of the inhibitory interaction of phospholamban with the Ca<sup>2+</sup> ATPase. *Proc Natl Acad Sci U S A*. 2003;100(2):467-72. Epub 2003/01/15. doi: 10.1073/pnas.0237326100. PubMed PMID: 12525698; PMCID: PMC141018.

18. Chen Z, Akin BL, Jones LR. Ca<sup>2+</sup> binding to site I of the cardiac Ca<sup>2+</sup> pump is sufficient to dissociate phospholamban. *J Biol Chem.* 2010;285(5):3253-60. Epub 2009/12/02. doi: 10.1074/jbc.M109.080820. PubMed PMID: 19948724; PMCID: PMC2823463.
19. Jones LR, Cornea RL, Chen Z. Close proximity between residue 30 of phospholamban and cysteine 318 of the cardiac Ca<sup>2+</sup> pump revealed by intermolecular thiol cross-linking. *J Biol Chem.* 2002;277(31):28319-29. Epub 2002/05/17. doi: 10.1074/jbc.M204085200. PubMed PMID: 12015326.
20. Karim CB, Zhang Z, Howard EC, Torgersen KD, Thomas DD. Phosphorylation-dependent conformational switch in spin-labeled phospholamban bound to SERCA. *J Mol Biol.* 2006;358(4):1032-40. Epub 2006/04/01. doi: 10.1016/j.jmb.2006.02.051. PubMed PMID: 16574147.
21. Gustavsson M, Verardi R, Mullen DG, Mote KR, Traaseth NJ, Gopinath T, Veglia G. Allosteric regulation of SERCA by phosphorylation-mediated conformational shift of phospholamban. *Proc Natl Acad Sci U S A.* 2013;110(43):17338-43. Epub 2013/10/09. doi: 10.1073/pnas.1303006110. PubMed PMID: 24101520; PMCID: PMC3808617.
22. Bidwell P, Blackwell DJ, Hou Z, Zima AV, Robia SL. Phospholamban Binds With Differential Affinity to Calcium Pump Conformers. *Journal of Biological Chemistry.* 2011;286(40):35044-50. doi: 10.1074/jbc.M111.266759.
23. Hou Z, Kelly EM, Robia SL. Phosphomimetic Mutations Increase Phospholamban Oligomerization and Alter the Structure of Its Regulatory Complex. *Journal of Biological Chemistry.* 2008;283(43):28996-7-9003. doi: 10.1074/jbc.M804782200.
24. Aguayo-Ortiz R, Espinoza-Fonseca LM. Atomistic Structure and Dynamics of the Ca(2+)-ATPase Bound to Phosphorylated Phospholamban. *Int J Mol Sci.* 2020;21(19). Epub 2020/10/07. doi: 10.3390/ijms21197261. PubMed PMID: 33019581; PMCID: PMC7583845.
25. Alford RF, Smolin N, Young HS, Gray JJ, Robia SL. Protein docking and steered molecular dynamics suggest alternative phospholamban-binding sites on the SERCA calcium transporter. *J Biol Chem.* 2020;295(32):11262-74. Epub 2020/06/20. doi: 10.1074/jbc.RA120.012948. PubMed PMID: 32554805; PMCID: PMC7415981.
26. Kimura Y, Kurzydowski K, Tada M, MacLennan DH. Phospholamban inhibitory function is activated by depolymerization. *J Biol Chem.* 1997;272(24):15061-4. Epub 1997/06/13. doi: 10.1074/jbc.272.24.15061. PubMed PMID: 9182523.
27. Cornea RL, Jones LR, Autry JM, Thomas DD. Mutation and phosphorylation change the oligomeric structure of phospholamban in lipid bilayers. *Biochemistry.* 1997;36(10):2960-7. Epub 1997/03/11. doi: 10.1021/bi961955q. PubMed PMID: 9062126.
28. Robia SL, Campbell KS, Kelly EM, Hou Z, Winters DL, Thomas DD. Forster transfer recovery reveals that phospholamban exchanges slowly from pentamers but rapidly from the SERCA regulatory complex. *Circ Res.* 2007;101(11):1123-9. Epub 2007/11/03. doi: 10.1161/CIRCRESAHA.107.159947. PubMed PMID: 17975108; PMCID: PMC2590498.
29. Koch D, Alexandrovich A, Funk F, Schmitt JP, Gautel M. Molecular Noise-Filtering in the  $\beta$ -adrenergic Signaling Network by Phospholamban Pentamers. *bioRxiv.* 2020:2020.12.30.424828. doi: 10.1101/2020.12.30.424828.
30. Nelson BR, Makarewich CA, Anderson DM, Winders BR, Troupes CD, Wu F, Reese AL, McAnally JR, Chen X, Kavalali ET, Cannon SC, Houser SR, Bassel-Duby R, Olson EN. A peptide encoded by a transcript annotated as long noncoding RNA enhances SERCA activity in muscle. *Science.* 2016;351(6270):271-5. doi: 10.1126/science.aad4076.
31. Makarewich CA, Bezprozvannaya S, Gibson AM, Bassel-Duby R, Olson EN. Gene Therapy With the DWORF Micropeptide Attenuates Cardiomyopathy in Mice. *Circ Res.* 2020;127(10):1340-2. Epub 2020/09/04. doi: 10.1161/CIRCRESAHA.120.317156. PubMed PMID: 32878549; PMCID: PMC7581560.
32. Li A, Yuen SL, Stroik DR, Kleinboehl E, Cornea RL, Thomas DD. The transmembrane peptide DWORF activates SERCA2a via dual mechanisms. *J Biol Chem.* 2021:100412. Epub 2021/02/14. doi: 10.1016/j.jbc.2021.100412. PubMed PMID: 33581112; PMCID: PMC7988493.
33. Makarewich CA, Munir AZ, Schiattarella GG, Bezprozvannaya S, Raguimova ON, Cho EE, Vidal AH, Robia SL, Bassel-Duby R, Olson EN. The DWORF micropeptide enhances contractility and prevents heart failure in a mouse model of dilated cardiomyopathy. *Elife.* 2018;7. Epub 2018/10/10. doi: 10.7554/eLife.38319. PubMed PMID: 30299255; PMCID: PMC6202051.
34. Singh DR, Dalton MP, Cho EE, Pribadi MP, Zak TJ, Seflova J, Makarewich CA, Olson EN, Robia SL. Newly Discovered Micropeptide Regulators of SERCA Form Oligomers but Bind to the Pump as Monomers. *Journal of Molecular Biology.* 2019;431(22):4429-43. doi: 10.1016/j.jmb.2019.07.037.

35. Mbikou P, Rademaker MT, Charles CJ, Richards MA, Pemberton CJ. Cardiovascular effects of DWORF (dwarf open reading frame) peptide in normal and ischaemia/reperfused isolated rat hearts. *Peptides*. 2020;124:170192. Epub 2019/11/13. doi: 10.1016/j.peptides.2019.170192. PubMed PMID: 31712056.
36. Raguimova ON, Smolin N, Bovo E, Bhayani S, Autry JM, Zima AV, Robia SL. Redistribution of SERCA calcium pump conformers during intracellular calcium signaling. *Journal of Biological Chemistry*. 2018;293(28):10843-56. doi: 10.1074/jbc.RA118.002472.
37. Albers RW. Biochemical aspects of active transport. *Annu Rev Biochem*. 1967;36:727-56. Epub 1967/01/01. doi: 10.1146/annurev.bi.36.070167.003455. PubMed PMID: 18257736.
38. Autry JM, Rubin JE, Svensson B, Li J, Thomas DD. Nucleotide activation of the Ca-ATPase. *J Biol Chem*. 2012;287(46):39070-82. Epub 2012/09/15. doi: 10.1074/jbc.M112.404434. PubMed PMID: 22977248; PMCID: PMC3493948.
39. Clausen JD, Vandecaetsbeek I, Wuytack F, Vangheluwe P, Andersen JP. Distinct roles of the C-terminal 11th transmembrane helix and luminal extension in the partial reactions determining the high Ca<sup>2+</sup> affinity of sarco(endo)plasmic reticulum Ca<sup>2+</sup>-ATPase isoform 2b (SERCA2b). *J Biol Chem*. 2012;287(47):39460-9. Epub 2012/10/02. doi: 10.1074/jbc.M112.397331. PubMed PMID: 23024360; PMCID: PMC3501024.
40. Dode L, Andersen JP, Leslie N, Dhitavat J, Vilsen B, Hovnanian A. Dissection of the functional differences between sarco(endo)plasmic reticulum Ca<sup>2+</sup>-ATPase (SERCA) 1 and 2 isoforms and characterization of Darier disease (SERCA2) mutants by steady-state and transient kinetic analyses. *J Biol Chem*. 2003;278(48):47877-89. Epub 2003/09/17. doi: 10.1074/jbc.M306784200. PubMed PMID: 12975374.
41. Kelly EM, Hou Z, Bossuyt J, Bers DM, Robia SL. Phospholamban oligomerization, quaternary structure, and sarco(endo)plasmic reticulum calcium ATPase binding measured by fluorescence resonance energy transfer in living cells. *J Biol Chem*. 2008;283(18):12202-11. Epub 2008/02/22. doi: 10.1074/jbc.M707590200. PubMed PMID: 18287099; PMCID: PMC2335368.
42. Hughes G, Starling AP, Sharma RP, East JM, Lee AG. An investigation of the mechanism of inhibition of the Ca(2+)-ATPase by phospholamban. *Biochem J*. 1996;318 ( Pt 3):973-9. Epub 1996/09/15. doi: 10.1042/bj3180973. PubMed PMID: 8836146; PMCID: PMC1217713.
43. Mintz E, Mata AM, Forge V, Passafiume M, Guillain F. The modulation of Ca<sup>2+</sup> binding to sarcoplasmic reticulum ATPase by ATP analogues is pH-dependent. *J Biol Chem*. 1995;270(45):27160-4. Epub 1995/11/10. doi: 10.1074/jbc.270.45.27160. PubMed PMID: 7592971.
44. Bovo E, Martin JL, Tyryfter J, de Tombe PP, Zima AV. R-CEPIA1er as a new tool to directly measure sarcoplasmic reticulum [Ca] in ventricular myocytes. *Am J Physiol Heart Circ Physiol*. 2016;311(1):H268-75. Epub 2016/05/29. doi: 10.1152/ajpheart.00175.2016. PubMed PMID: 27233762; PMCID: PMC4967208.
45. Stewart BD, Scott CE, McCoy TP, Yin G, Despa F, Despa S, Kekenes-Huskey PM. Computational modeling of amylin-induced calcium dysregulation in rat ventricular cardiomyocytes. *Cell Calcium*. 2018;71:65-74. Epub 2018/04/02. doi: 10.1016/j.ceca.2017.11.006. PubMed PMID: 29604965; PMCID: PMC5881945.
46. Mueller B, Karim CB, Negrasshov IV, Kutchai H, Thomas DD. Direct detection of phospholamban and sarcoplasmic reticulum Ca-ATPase interaction in membranes using fluorescence resonance energy transfer. *Biochemistry*. 2004;43(27):8754-65. doi: 10.1021/bi049732k.
47. Fukuzawa A, Koch D, Grover S, Rees M, Gautel M. When is an obscurin variant pathogenic? The impact of Arg4344Gln and Arg4444Trp variants on protein-protein interactions and protein stability. *Hum Mol Genet*. 2021. Epub 2021/01/14. doi: 10.1093/hmg/ddab010. PubMed PMID: 33438037.
48. Brady AJ, Tan ST, Ricchiuti NV. Contractile force measured in unskinned isolated adult rat heart fibres. *Nature*. 1979;282(5740):728-9. Epub 1979/12/13. doi: 10.1038/282728a0. PubMed PMID: 514354.
49. Autry JM, Rubin JE, Pietrini SD, Winters DL, Robia SL, Thomas DD. Oligomeric interactions of sarcolipin and the Ca-ATPase. *J Biol Chem*. 2011;286(36):31697-706. Epub 2011/07/09. doi: 10.1074/jbc.M111.246843. PubMed PMID: 21737843; PMCID: PMC3173058.
50. Blackwell DJ, Zak TJ, Robia SL. Cardiac Calcium ATPase Dimerization Measured by Cross-Linking and Fluorescence Energy Transfer. *Biophys J*. 2016;111(6):1192-202. Epub 2016/09/23. doi: 10.1016/j.bpj.2016.08.005. PubMed PMID: 27653478; PMCID: PMC5034344.
51. Ferrington DA, Yao Q, Squier TC, Bigelow DJ. Comparable levels of Ca-ATPase inhibition by phospholamban in slow-twitch skeletal and cardiac sarcoplasmic reticulum. *Biochemistry*. 2002;41(44):13289-96. Epub 2002/10/31. doi: 10.1021/bi026407t. PubMed PMID: 12403631.
52. Schoenmakers TJ, Visser GJ, Flik G, Theuvenet AP. CHELATOR: an improved method for computing metal ion concentrations in physiological solutions. *Biotechniques*. 1992;12(6):870-4, 6-9. Epub 1992/06/01. PubMed PMID: 1642895.

53. Lambert TJ. FPbase: a community-editable fluorescent protein database. *Nat Methods*. 2019;16(4):277-8. Epub 2019/03/20. doi: 10.1038/s41592-019-0352-8. PubMed PMID: 30886412.
54. Sun B, Stewart BD, Kucharski AN, Kekenes-Huskey PM. Thermodynamics of Cation Binding to the Sarcoendoplasmic Reticulum Calcium ATPase Pump and Impacts on Enzyme Function. *J Chem Theory Comput*. 2019;15(4):2692-705. Epub 2019/02/27. doi: 10.1021/acs.jctc.8b01312. PubMed PMID: 30807147; PMCID: PMC7336277.
